# Supplementary material for: DNA isolation protocol effects on nuclear DNA analysis by microarrays, droplet digital PCR, and whole genome sequencing, and on mitochondrial DNA copy number estimation
Source: PubMed Central journal article supplement (PMC5500342; doi:10.1371/journal.pone.0180467), 2017-07-06

# brain dLRs

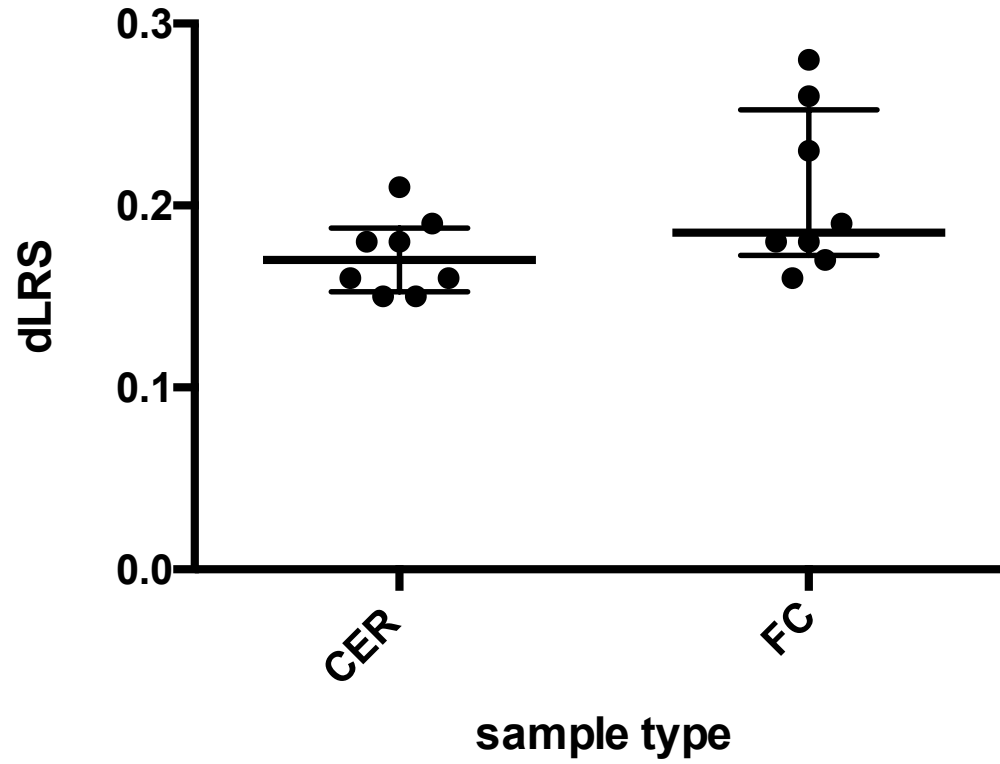

Supplement: pone.0180467.s001.pdf [file pone.0180467.s001.pdf]
