# Supplementary material for: DNA isolation protocol effects on nuclear DNA analysis by microarrays, droplet digital PCR, and whole genome sequencing, and on mitochondrial DNA copy number estimation
Source: PubMed Central journal article supplement (PMC5500342; doi:10.1371/journal.pone.0180467), 2017-07-06
Supplement: pone.0180467.s007.pdf [file pone.0180467.s007.pdf]

**A**

Array data from control cerebellum 1

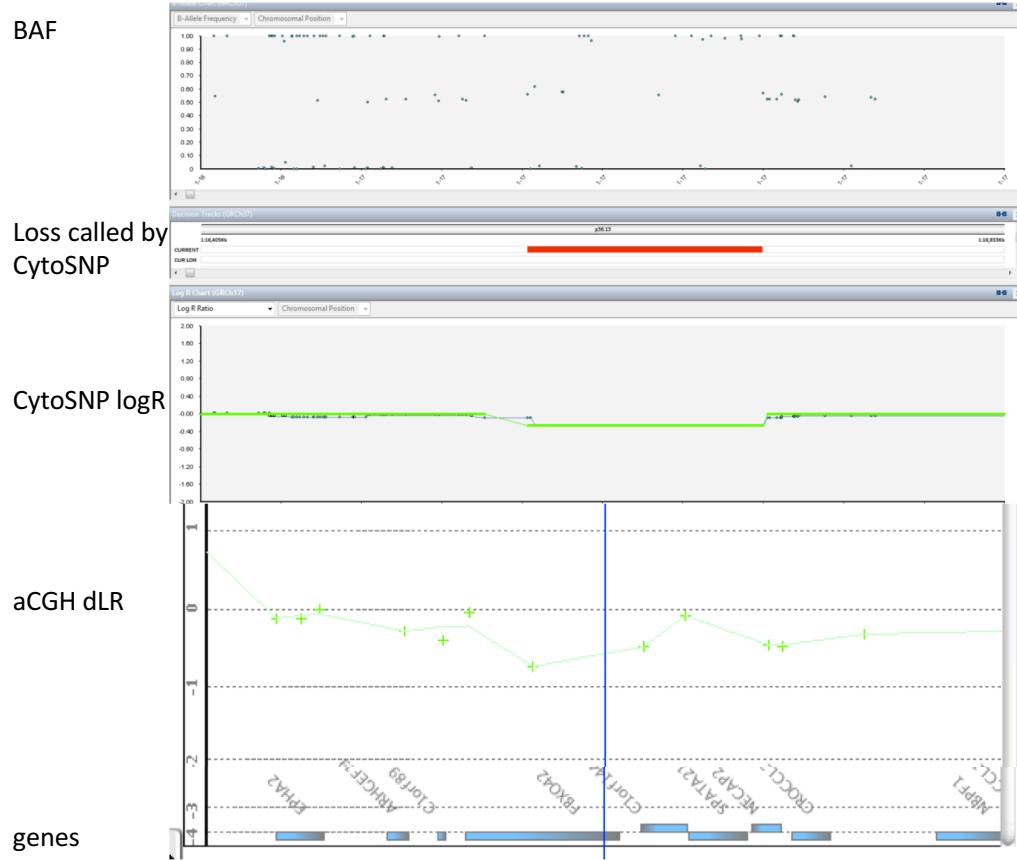

CytoSNP logR from other samples where no loss called, but probe signals negative

C2 cerebellum

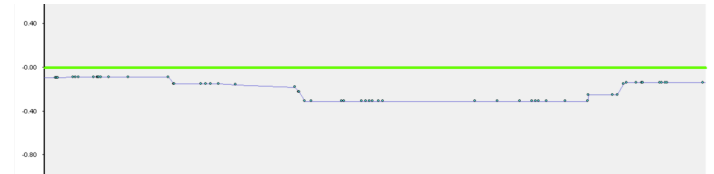

C4 cerebellum

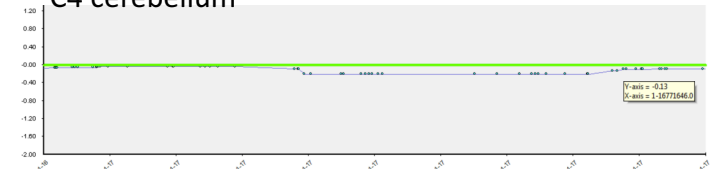

C4 FC

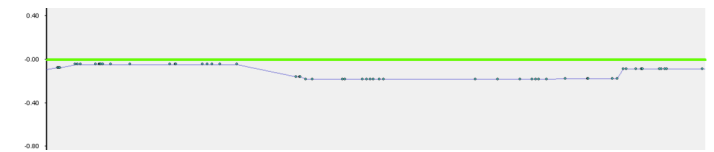

**B**

## Array data from control cerebellum 1

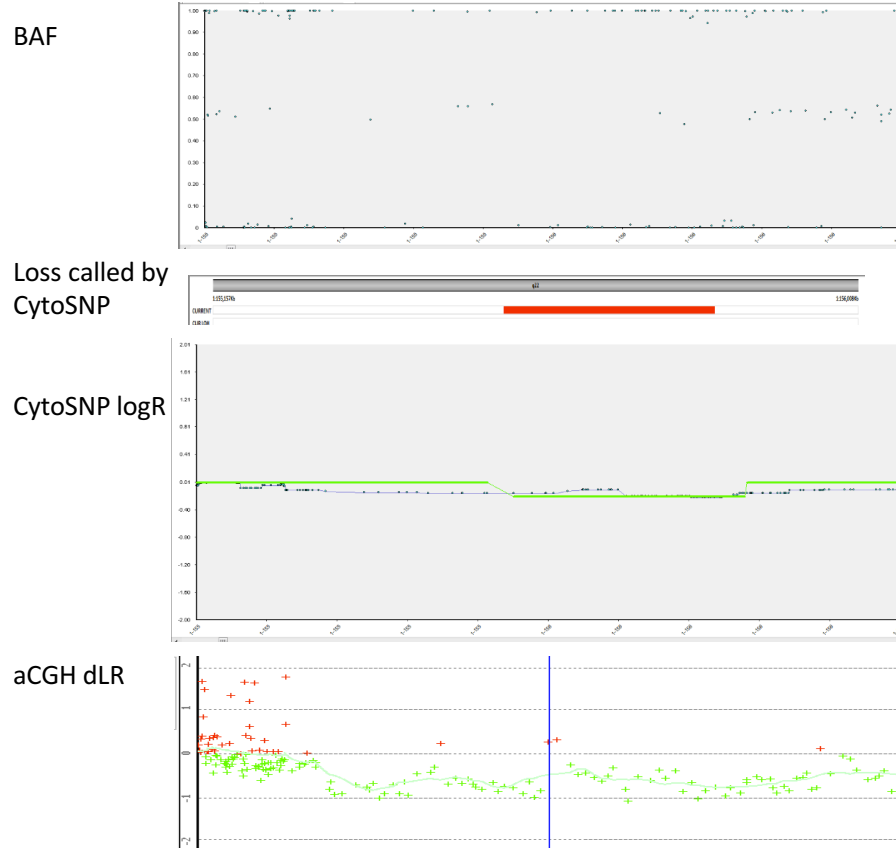

## CytoSNP logR from other cerebellar samples

## C2 cerebellum

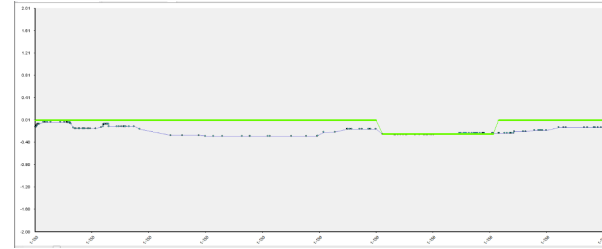

## C3 cerebellum

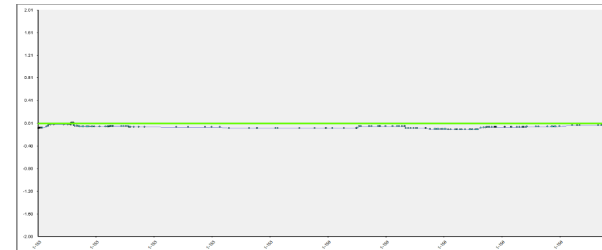

## C4 cerebellum

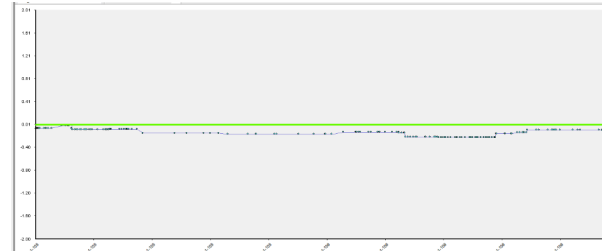**1: 155157290-156007630, 850 Kb**
